# Supplementary material
Source: publisher figshare collection journal article supplement (https://gsapubs.figshare.com/ndownloader/files/34382555)
Supplement: Supplementary file 1 [file 34382555]

## Sheet: Sheet1
TABLE S2. RESULTS OF LA-ICP-MS U-PB ISOTOPE ANALYSIS OF HYDROTHERMAL MONAZITE, APATITE, AND RUTILE FROM THE SHANGGONG GOLD DEPOSIT
Spot no.	Th	U	207Pb/235U		206Pb/238U		207Pb/206Pb		Rho	208Pb/232Th		f206	207Pb-corrected age
	ppm	ppm	Ratio	2σ	Ratio	2σ	Ratio	2σ		Ratio	2σ		Ma	2σ
Mnz_SG-72-01	31594	97.52	5.05029	0.391396	0.313667	0.00977151	0.117952	0.00884794	0.401969	0.0885662	0.000931757	0.012595	1735.82	56.8266
Mnz_SG-72-02	24610	48.49	5.05588	0.77205	0.312417	0.0297551	0.126632	0.0252038	0.623704	0.0842963	0.00149294	0.0226897	1709.96	169.656
Mnz_SG-72-03	30796	62.8	5.9075	0.626626	0.323616	0.0157606	0.132764	0.0124583	0.459132	0.0784562	0.000906078	0.0298207	1756.49	89.219
Mnz_SG-72-04	18913	62.36	5.33417	0.795797	0.302333	0.0193103	0.132081	0.0227072	0.428123	0.0876865	0.00112527	0.0290269	1644.18	113.579
Mnz_SG-72-05	24273	33.45	6.46454	0.90527	0.332388	0.0239669	0.146248	0.0239459	0.514902	0.0905169	0.00146892	0.0455016	1772.02	138.395
Mnz_SG-72-06	22094	33.95	6.03423	0.700133	0.325265	0.0181217	0.142525	0.018842	0.480178	0.0869574	0.000952002	0.0411724	1743	105.151
Mnz_SG-72-07	19740	30.72	8.10422	0.923178	0.338594	0.0192012	0.181203	0.0233954	0.497825	0.0884833	0.00102424	0.0861527	1721.44	111.19
Mnz_SG-72-08	27700	66.95	5.89764	0.670706	0.32088	0.0104625	0.133541	0.0145931	0.286707	0.0927728	0.00101271	0.0307238	1740.06	64.9838
Mnz_SG-72-09	32885	88.56	5.02953	0.460249	0.312894	0.015692	0.119654	0.0129438	0.548045	0.0917214	0.00128183	0.0145747	1727.86	90.0834
Mnz_SG-72-10	16728	64.38	7.61548	0.713324	0.333614	0.0139806	0.167245	0.0152388	0.447397	0.0855159	0.000915305	0.0699211	1729.18	79.939
Mnz_SG-72-11	22465	27.26	17.7357	2.49196	0.411317	0.0397102	0.329394	0.0455226	0.687122	0.0872655	0.00128703	0.258493	1658.07	204.731
Mnz_SG-72-12	25722	26.54	7.6302	1.23342	0.342371	0.0240985	0.181004	0.0358479	0.435429	0.0917393	0.00121852	0.0859215	1740.87	148.643
Mnz_SG-72-13	17557	52.87	9.08954	2.06323	0.3413	0.0227291	0.17824	0.029313	0.293386	0.0874124	0.00117915	0.0827072	1742.13	134.473
Mnz_SG-72-14	27031	55.97	15.2963	1.96081	0.386112	0.0231004	0.288495	0.0341988	0.466721	0.0810307	0.00113558	0.210929	1668.82	134.935
Mnz_SG-72-15	25431	69.12	5.082	0.53168	0.31056	0.011551	0.121238	0.0138039	0.355516	0.0874539	0.00120721	0.0164168	1711.7	69.5584
Mnz_SG-72-16	17698	63.44	5.8257	0.716602	0.320727	0.0150243	0.132061	0.0148949	0.380829	0.0834593	0.000879384	0.0290034	1742.58	87.339
Mnz_SG-72-17	9659	40.32	6.13615	0.866282	0.322442	0.0204197	0.142339	0.0217846	0.448575	0.0824263	0.00113992	0.0409556	1728.48	118.722
Mnz_SG-72-18	17854	62.83	5.91103	0.520503	0.319739	0.0134181	0.137824	0.0129299	0.47658	0.0882751	0.00080579	0.0357057	1724.33	77.0436
Mnz_SG-72-19	26825	41.31	4.83207	0.627368	0.311976	0.0160069	0.116231	0.0164739	0.395182	0.0904961	0.00097499	0.0105939	1730.37	94.7402
Mnz_SG-72-20	19383	46.46	7.45988	0.708412	0.339534	0.0137582	0.164607	0.0170413	0.426702	0.0873104	0.000965359	0.0668528	1765.8	81.7263
Mnz_SG-72-21	23766	40.89	7.03484	1.07969	0.336375	0.0174292	0.154391	0.0241919	0.337605	0.0920875	0.001037	0.054972	1773.75	107.597
Mnz_SG-72-22	20075	48.66	15.94	1.86798	0.378229	0.0211976	0.304081	0.0314074	0.478243	0.0863102	0.00101316	0.229054	1594.26	120.616
Mnz_SG-72-23	23616	34.4	16.7901	2.23893	0.406997	0.0264535	0.295189	0.0339195	0.487424	0.0864849	0.00110687	0.218714	1738.54	148.096
Mnz_SG-72-24	25395	53.91	13.4268	1.71154	0.378375	0.0199978	0.258165	0.0316201	0.414617	0.0875787	0.00113404	0.175656	1716.35	122.807
Mnz_SG-72-25	24958	44.61	6.9509	0.645097	0.330694	0.0158373	0.15643	0.0157918	0.516026	0.0889135	0.000975178	0.0573434	1739.38	90.0833
Mnz_SG-72-26	21303	42.45	8.68029	0.826629	0.348662	0.011698	0.186672	0.0195774	0.352314	0.0893458	0.000915978	0.092513	1758.57	75.653
Mnz_SG-72-27	22671	37.89	5.01895	0.862723	0.316564	0.0208565	0.117142	0.018324	0.383286	0.0894999	0.0010816	0.0116525	1753.46	121.273
Mnz_SG-72-28	28763	125.89	4.7691	0.33593	0.31006	0.00917822	0.111944	0.0079375	0.420243	0.0909679	0.000976645	0.0056075	1729.22	53.3729
Mnz_SG-72-29	31296	70.03	5.5634	0.548338	0.317732	0.0124787	0.131514	0.0157819	0.398475	0.0942599	0.00172162	0.0283669	1727.74	75.638
Mnz_SG-72-30	20842	58.43	7.35077	0.786297	0.337594	0.018923	0.161726	0.0187604	0.524013	0.0793469	0.00113306	0.0635022	1762.67	107.458
Spot no.	Th	U	207Pb/235U		238U/206Pb		207Pb/206Pb		Rho	208Pb/232Th		f206	207Pb-corrected age
	ppm	ppm	Ratio	2σ	Ratio	2σ	Ratio	2σ		Ratio	2σ		Ma	2σ
Ap_SG-74-1	21.1	65.3	5.75	0.8	2.63783	0.0695813	0.1963	0.0076	0.11334	*	*	0.111073	1758.73	71.5104
Ap_SG-74-2	4.82	2.98	21	13	1.20773	0.0831408	0.603	0.026	0.49475	*	*	0.617626	1106.62	220.769
Ap_SG-74-3	0.45	0.75	44.9	3.4	1.60514	0.100482	0.498	0.03	0.090738	*	*	0.486846	1761.13	172.918
Ap_SG-74-4	1.14	3.43	17.2	5.2	1.42857	0.0510204	0.515	0.011	-0.01205	*	*	0.50802	1337.78	131.211
Ap_SG-74-5	0.82	5.81	18.97	0.61	2.6178	0.102793	0.347	0.01	0.56369	*	*	0.298773	1495.68	63.7764
Ap_SG-74-6	0.46	2.23	21.3	1.3	2.331	0.114105	0.359	0.013	-0.056171	*	*	0.313719	1639.21	88.532
Ap_SG-74-7	0.44	0.33	55.8	4.4	1.31926	0.104427	0.538	0.037	0.39733	*	*	0.536667	1926.36	255.293
Ap_SG-74-8	0.24	0.25	80.4	6.5	1.0929	0.0752486	0.624	0.037	0.30569	*	*	0.643782	1765.6	271.918
Ap_SG-74-9	0.48	0.99	46.3	3.6	1.55279	0.0868022	0.526	0.021	-0.1776	*	*	0.521721	1693.03	135.959
Ap_SG-74-10	0.4	1.32	41.4	1.9	1.71821	0.0679019	0.518	0.019	0.28088	*	*	0.511757	1565.77	101.151
Ap_SG-1-1	12	2.67	72.1	3.5	1.31234	0.0654446	0.678	0.02	0.15899	0.342	0.024	0.621954	1190.47	129.106
Ap_SG-1-2	18.67	3.94	36.2	2.7	1.90476	0.108843	0.51	0.016	-0.17414	0.204	0.017	0.438923	1445.61	101.71
Ap_SG-1-3	22.61	2.82	51	2.7	1.61031	0.0829787	0.595	0.02	0.32365	0.1469	0.0067	0.531528	1335.83	113.626
Ap_SG-1-4	11.92	2.89	30	1	2.07469	0.077478	0.459	0.014	0.25022	0.1924	0.009	0.38336	1501.35	74.2174
Ap_SG-1-5	13.45	2.84	38.2	1.8	1.86916	0.0803564	0.515	0.016	0.10886	0.1858	0.011	0.444371	1453.77	88.1108
Ap_SG-1-6	36.51	6.53	66.7	14	1.39276	0.232773	0.663	0.018	-0.62658	0.247	0.041	0.605612	1198.96	217.476
Ap_SG-1-7	92.5	13.47	85.6	25	1.20482	0.290318	0.723	0.019	-0.55085	0.305	0.028	0.67098	1033.13	269.902
Ap_SG-1-8	22.4	3.02	63	30	1.43885	0.476166	0.683	0.029	0.24462	0.191	0.074	0.627402	1065.09	370.478
Ap_SG-1-9	11.09	2.27	47.4	1.4	1.65563	0.0685277	0.569	0.017	0.53163	0.218	0.012	0.503202	1409.38	95.7474
Ap_SG-1-10	22.2	5.01	28.28	0.92	2.12766	0.067904	0.432	0.011	0.15217	0.1737	0.0075	0.353945	1553.22	62.4745
Ap_SG-1-11	42.4	3.61	42.1	8	1.79533	0.206286	0.541	0.023	0.22203	0.1161	0.015	0.472697	1411.28	182.429
Ap_SG-1-12	8.03	1.93	51.6	2	1.55039	0.0528814	0.589	0.016	0.22629	0.259	0.013	0.524991	1412.62	91.7417
Ap_SG-1-13	8.53	1.75	93.1	6.7	1.0977	0.055427	0.713	0.023	-0.029423	0.366	0.02	0.660086	1193.58	167.494
Ap_SG-1-14	11.95	2.05	82	33	1.15607	0.400949	0.691	0.021	0.11317	0.307	0.11	0.636117	1267.57	446.242
Ap_SG-1-15	9.15	1.96	87.5	19	1.10865	0.208947	0.7	0.024	0.36038	0.385	0.067	0.645923	1263.62	280.607
Ap_SG-1-16	6.71	1.84	50.3	1.9	1.56495	0.0612263	0.577	0.023	0.069875	0.28	0.013	0.511918	1453.09	120.367
Ap_SG-1-17	10.9	2.68	43.8	1.6	1.68919	0.0656273	0.542	0.015	0.19008	0.237	0.013	0.473786	1493.18	88.0363
Ap_SG-1-18	7.47	2.07	47.5	15	1.5873	0.327538	0.548	0.023	0.39683	0.291	0.075	0.480323	1560.18	331.168
Ap_SG-1-19	6.55	1.89	104.3	4.7	0.970874	0.0461872	0.741	0.016	0.22284	0.569	0.03	0.690591	1143.65	144.103
Ap_SG-1-20	28.4	4.96	60.7	8.9	1.39276	0.128025	0.616	0.019	-0.29856	0.2314	0.013	0.554407	1433.1	163.756
Ap_SG-1-21	15.23	3.57	44.4	22	1.64474	0.127142	0.526	0.045	0.24394	0.2452	0.031	0.456355	1600.18	227.514
Ap_SG-1-22	12.93	2.33	68.7	8.3	1.27226	0.113306	0.636	0.021	0.63304	0.2587	0.01	0.576196	1455.67	175.891
Ap_SG-1-23	19.96	3.26	43.4	1.6	1.70068	0.0636309	0.529	0.013	-0.0019894	0.1853	0.0077	0.459623	1536.5	81.6827
Ap_SG-1-24	7.55	2.06	45.3	1.3	1.64204	0.0593182	0.54	0.014	0.48378	0.272	0.012	0.471607	1543.37	85.2619
Ap_SG-1-25	13.91	3.35	30.69	0.67	1.9685	0.0620001	0.44	0.011	0.55514	0.1868	0.0084	0.362661	1647.56	66.6688
Ap_SG-1-26	9.24	2.07	50.8	4.3	1.49477	0.0826703	0.555	0.021	0.4262	0.254	0.03	0.487949	1621.86	135.477
Ap_SG-1-27	10.87	2.81	40.1	1.2	1.74216	0.0576673	0.503	0.013	0.19079	0.2451	0.011	0.431297	1604.75	77.465
Rt_18SG-98-1	3.89	3.45	42	2.8	1.5625	0.065918	0.471	0.02	0.12799	0.749	0.042	0.490482	1931.77	125.638
Rt_18SG-98-2	0.81	2.14	27.4	3.2	1.93798	0.14272	0.372	0.031	0.053532	1.48	0.34	0.357037	1921.08	183.242
Rt_18SG-98-3	5.48	5.57	21.05	1.3	2.20751	0.0779693	0.333	0.02	0.51419	1.33	0.49	0.304468	1812.34	90.9643
Rt_18SG-98-4	15.51	4.99	11.18	0.95	2.7027	0.109569	0.221	0.016	0.062361	0.155	0.078	0.1535	1775.57	82.735
Rt_18SG-98-5	8.63	4.6	7.61	0.57	2.91971	0.110821	0.1568	0.01	0.40393	0.631	0.038	0.0669627	1799.95	72.0268
Rt_18SG-98-6	0.54	1.94	54.5	5	1.32626	0.0809124	0.536	0.03	-0.0074691	10.1	1	0.578098	1926.94	203.689
Rt_18SG-98-7	5.4	3.49	46.7	3.7	1.49254	0.060147	0.509	0.026	-0.18052	2.54	0.12	0.541704	1840.92	146.894
Rt_18SG-98-8	2.08	2.95	42.9	2.9	1.54799	0.0742842	0.483	0.027	0.40857	2.17	0.16	0.506658	1894.51	156.473
Rt_18SG-98-9	17.61	3.98	35.1	3.2	1.69205	0.0830277	0.417	0.026	-0.15928	5.43	0.23	0.417694	2012.07	151.36
Rt_18SG-98-10	5.48	4.97	29.1	3.3	1.9084	0.116543	0.407	0.036	0.13978	-14.6	1.6	0.404215	1820.31	174.2
Rt_18SG-98-11	0.61	3.86	26	2	2.00401	0.084337	0.374	0.022	0.048618	-49.3	6.2	0.359733	1850.57	110.985
Rt_18SG-98-12	33.78	6.17	24.8	2.7	2.06612	0.11099	0.368	0.027	-0.39022	6.43	0.46	0.351646	1815.75	134.679
Rt_18SG-98-13	0.22	2.48	15.5	1.4	2.38664	0.136705	0.269	0.021	0.15737	-39.6	9	0.2182	1867.02	124.074
Rt_18SG-98-14	14.71	6.51	14.34	1.1	2.41546	0.110854	0.252	0.018	0.25248	0.571	0.034	0.195286	1894.87	102.324
Rt_18SG-98-15	8.35	4.73	14.64	1.2	2.43309	0.118399	0.256	0.019	0.2685	-2.64	0.14	0.200677	1869.41	106.772
Mnz = monazite; Ap = apatite; Rt = rutile
* denotes no data was output
The 207Pb-corrected ages are calculate using 207Pb/206Pb ratios of coexisting pyrite.
